# Supplementary material
Source: JCI journal article supplement (doi:10.1172/jci179533)

# Full unedited gel for Figure 1D

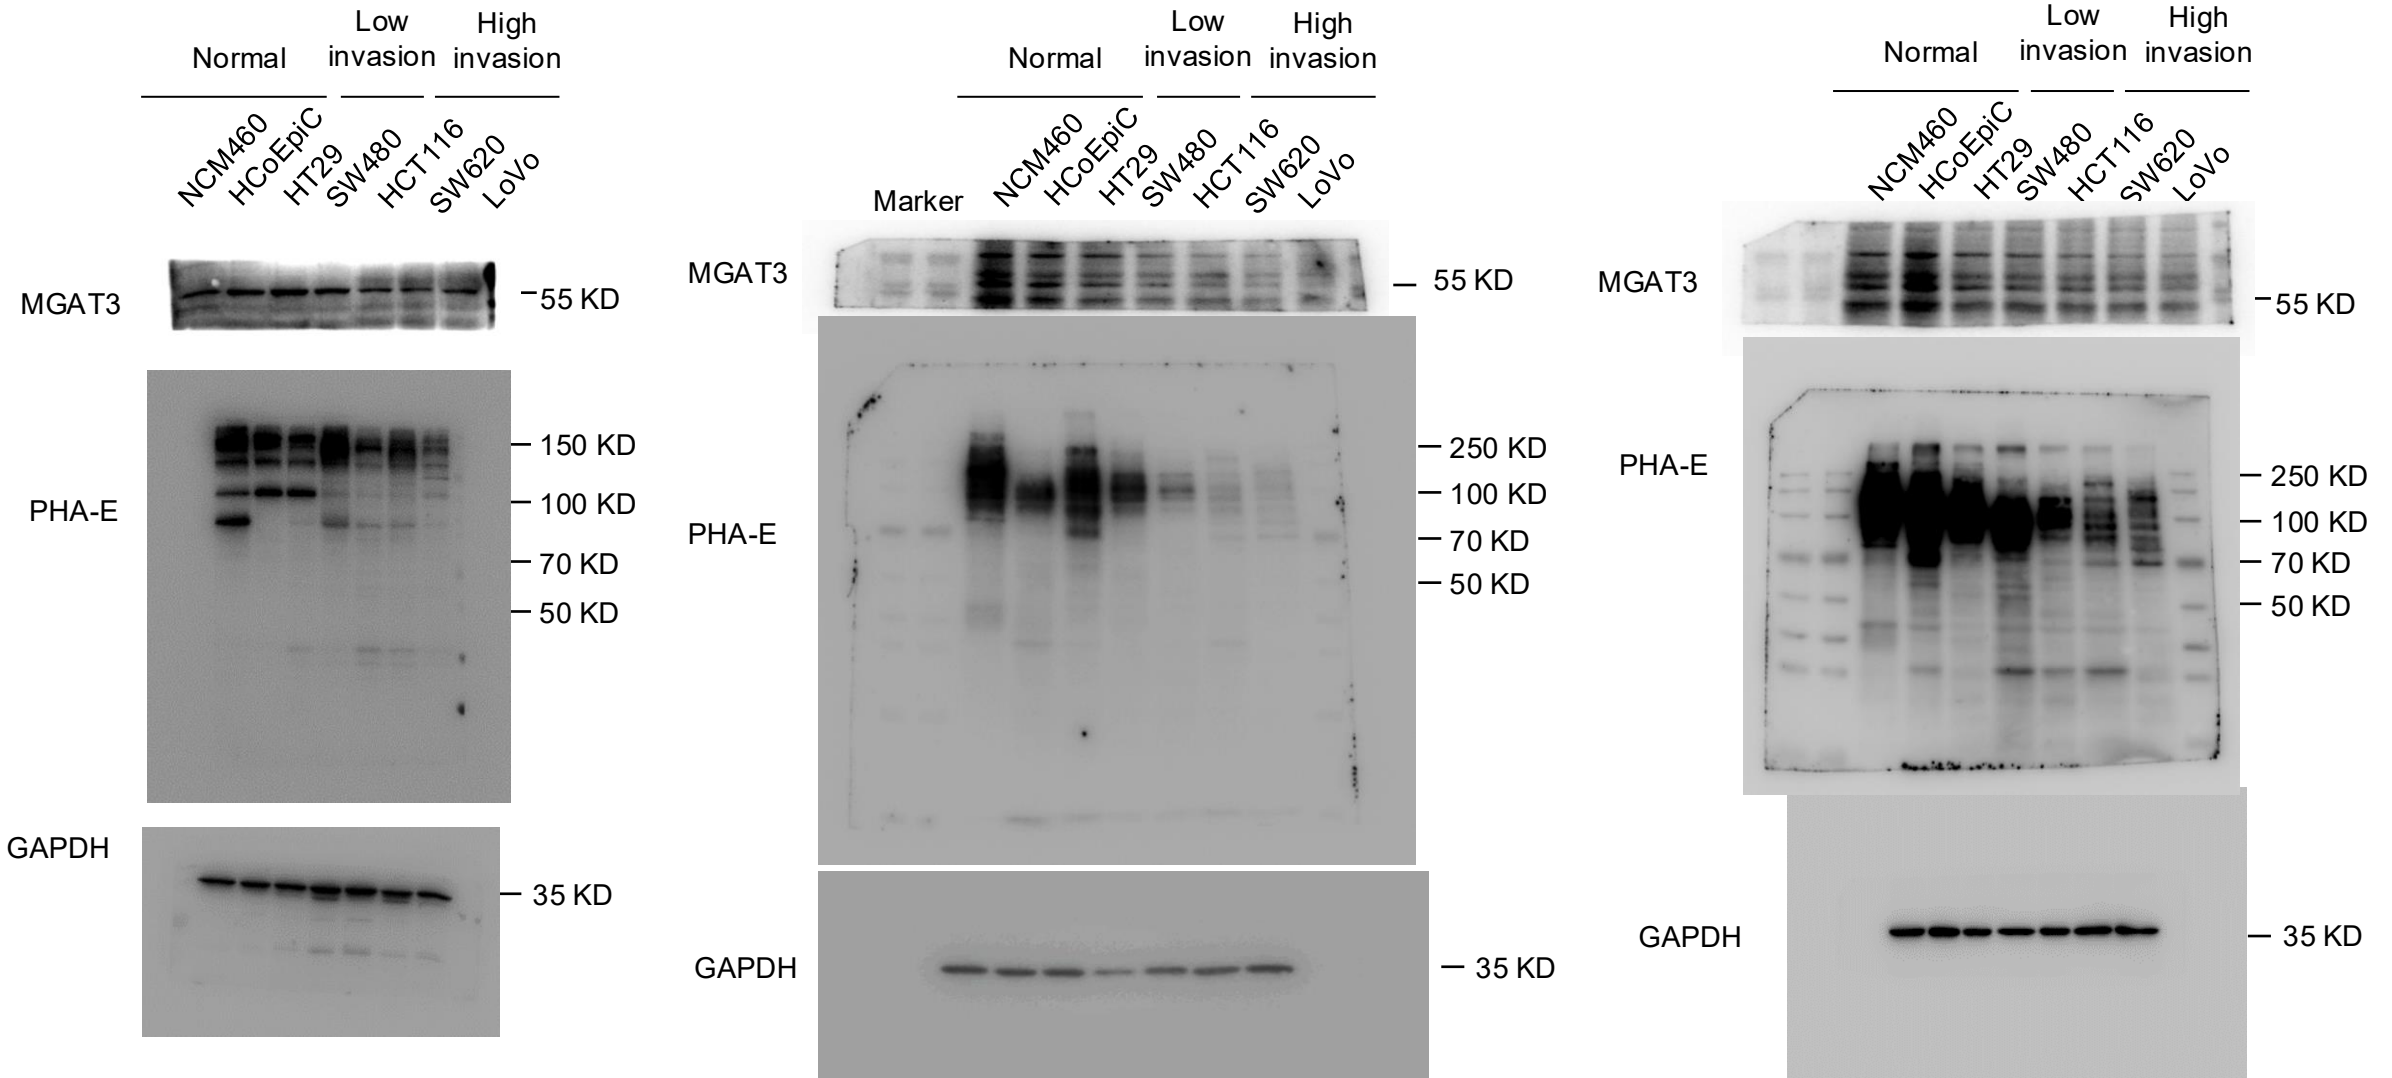

# Full unedited gel for Figure 3A

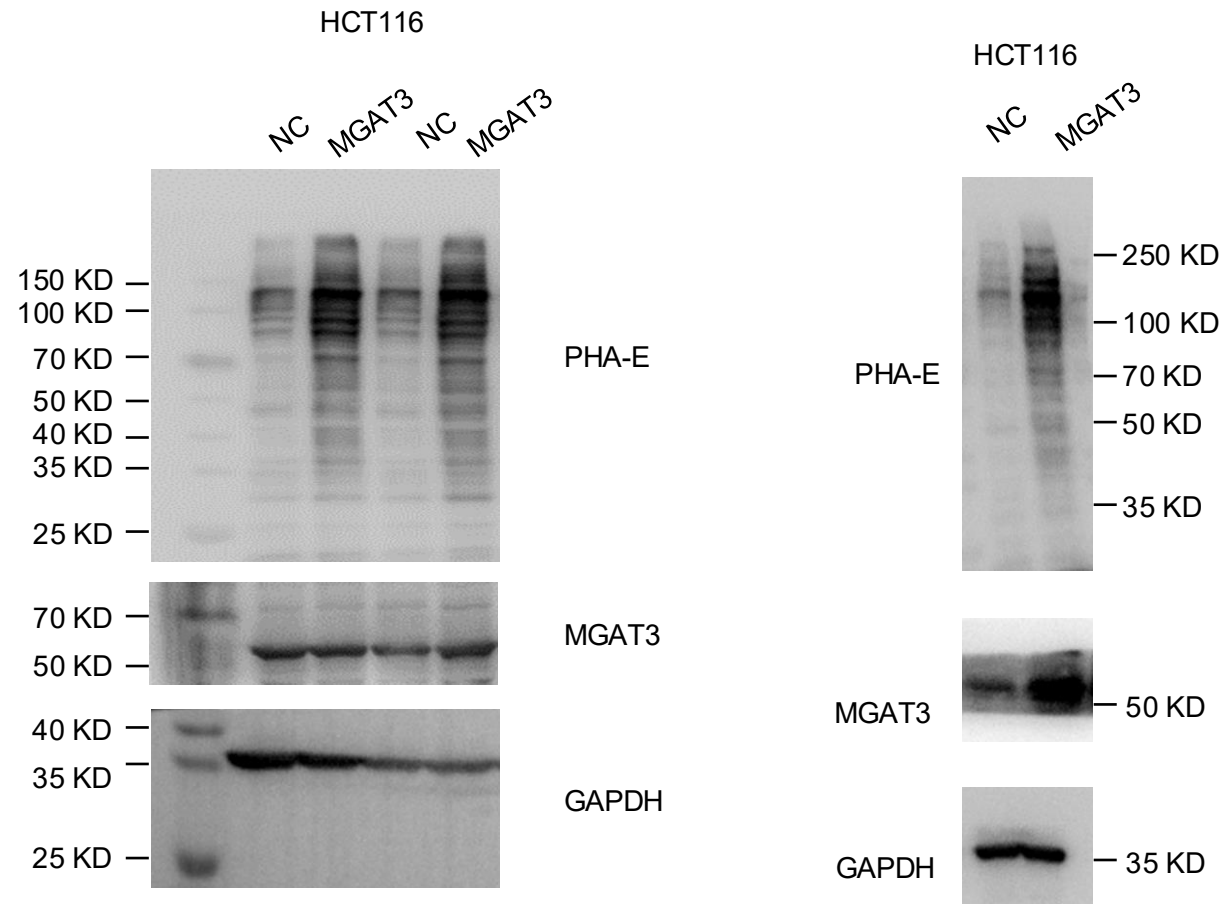

# Full unedited gel for Figure 3H

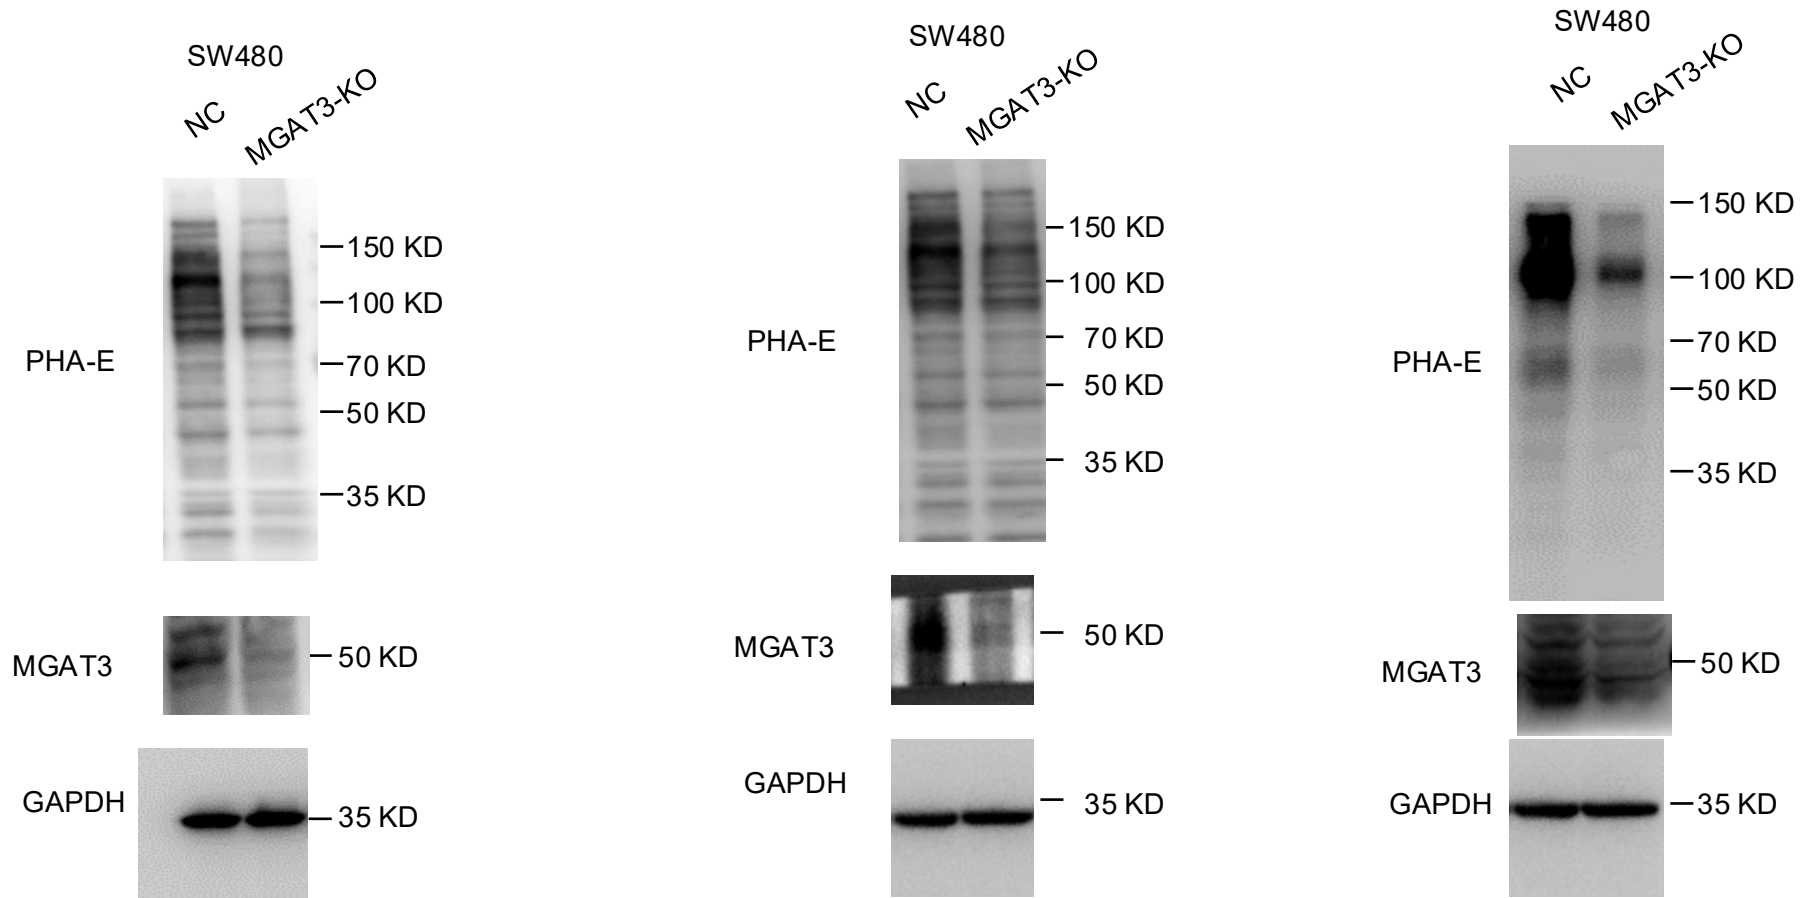

# Full unedited gel for Figure 4A

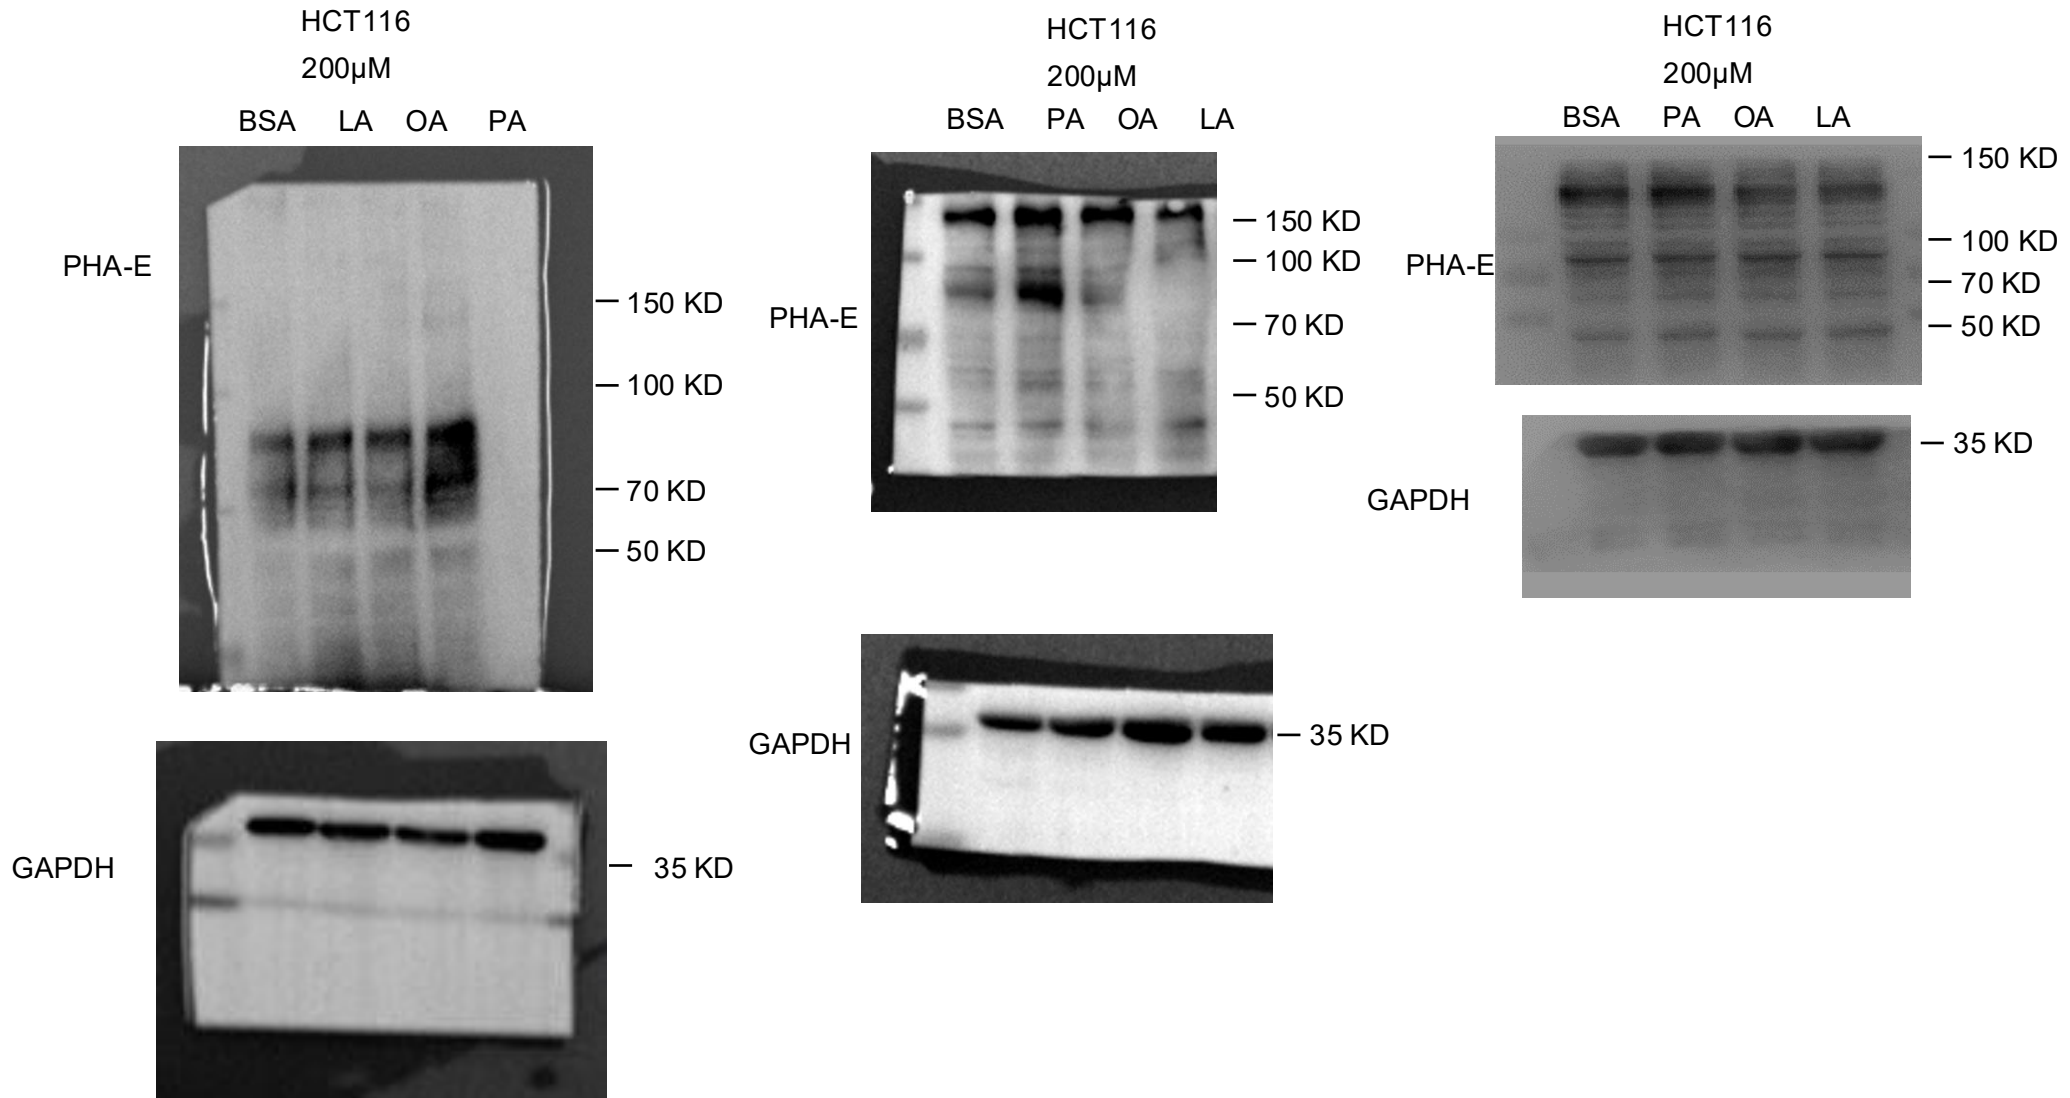

# Full unedited gel for Figure 4I

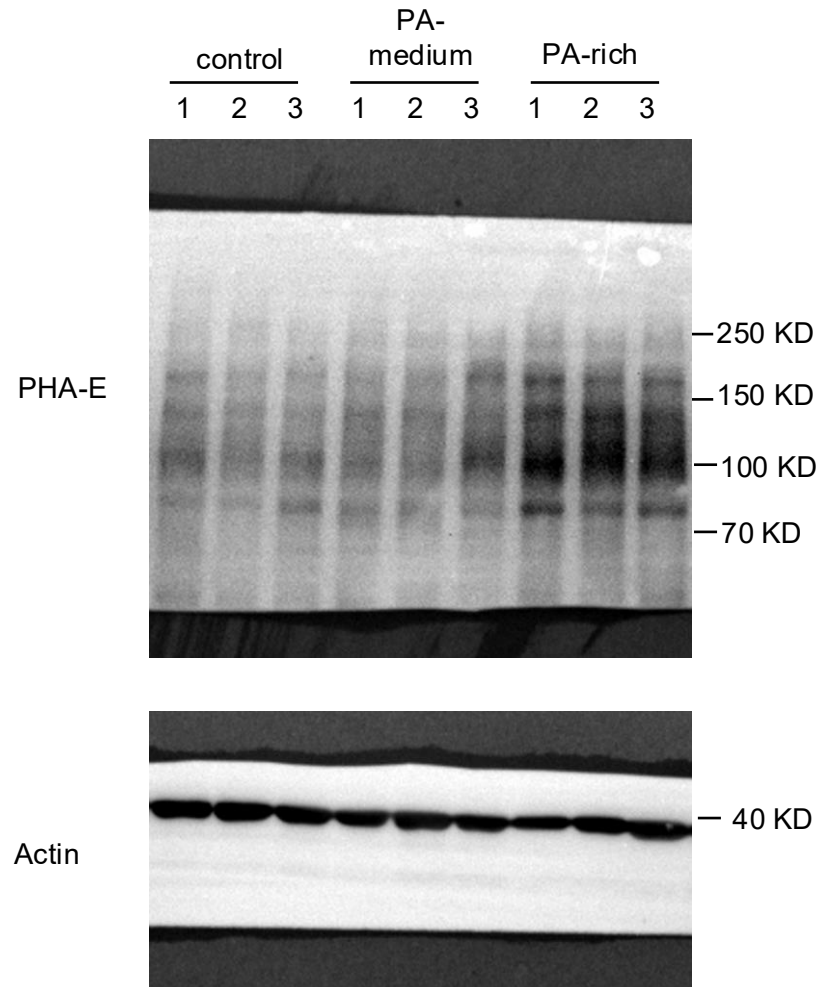

# Full unedited gel for Figure 5A

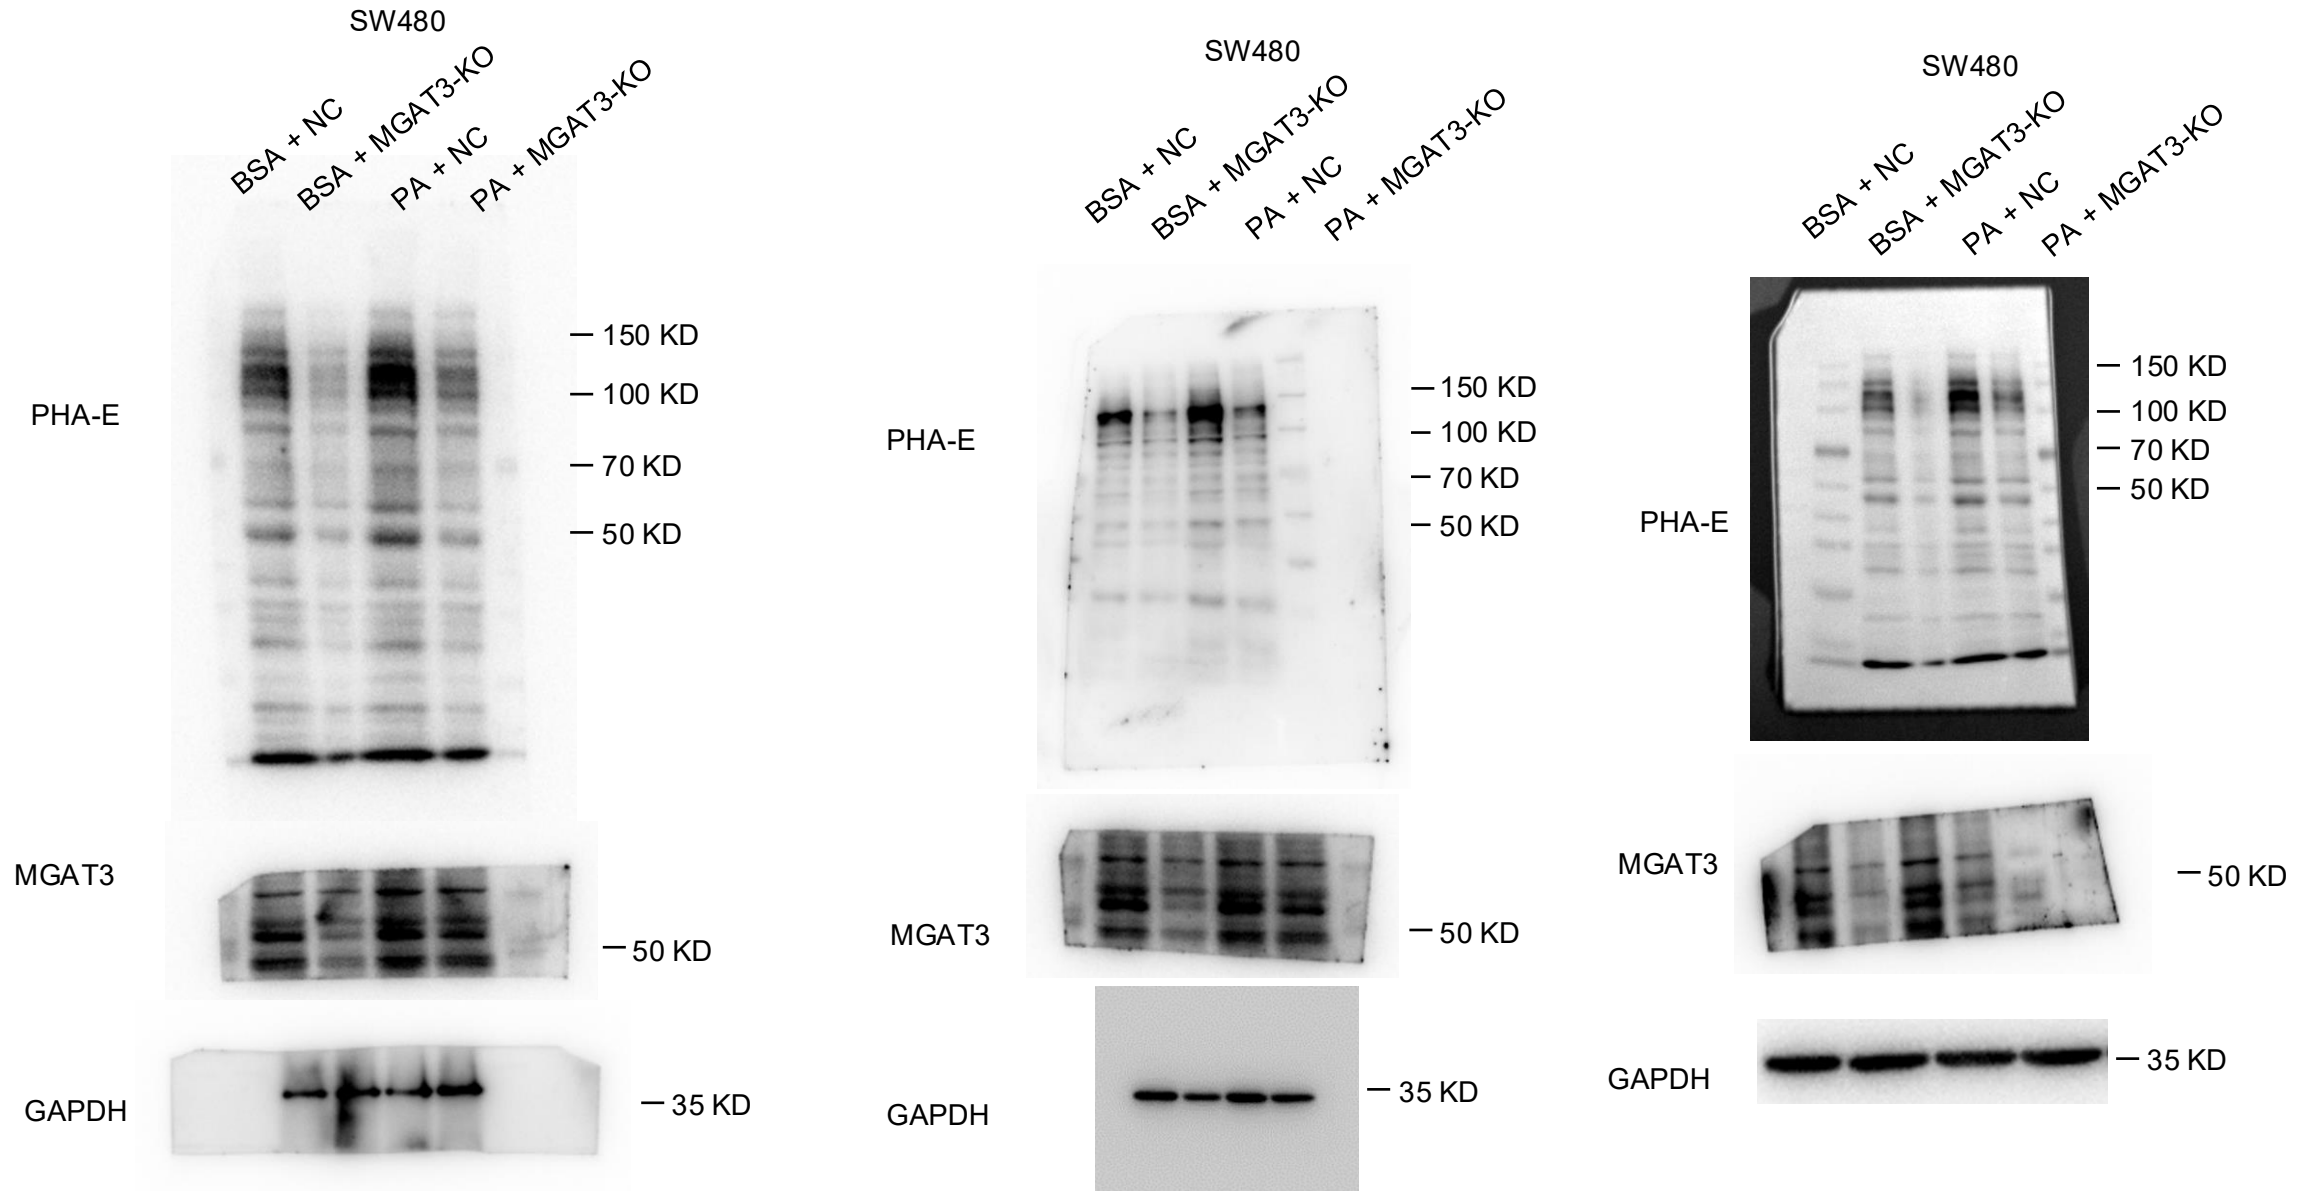

# Full unedited gel for Figure 5I

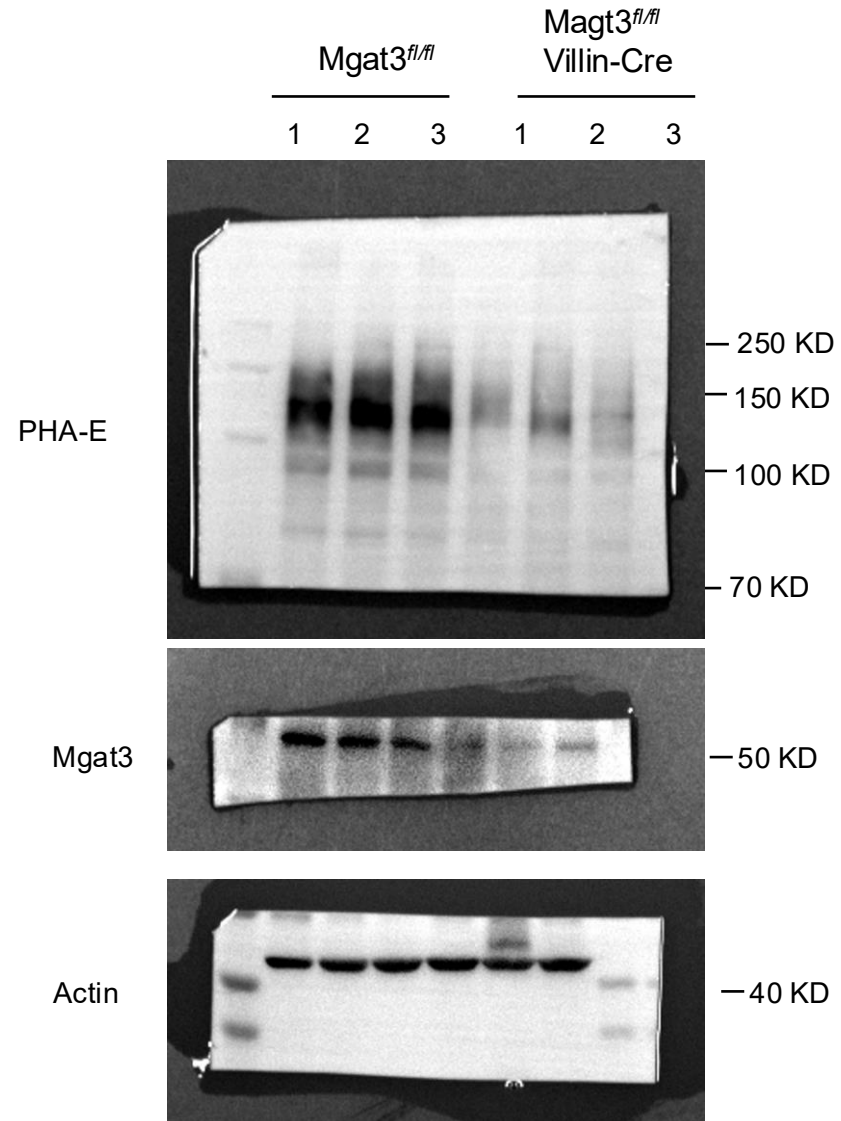

# Full unedited gel for Figure 6C

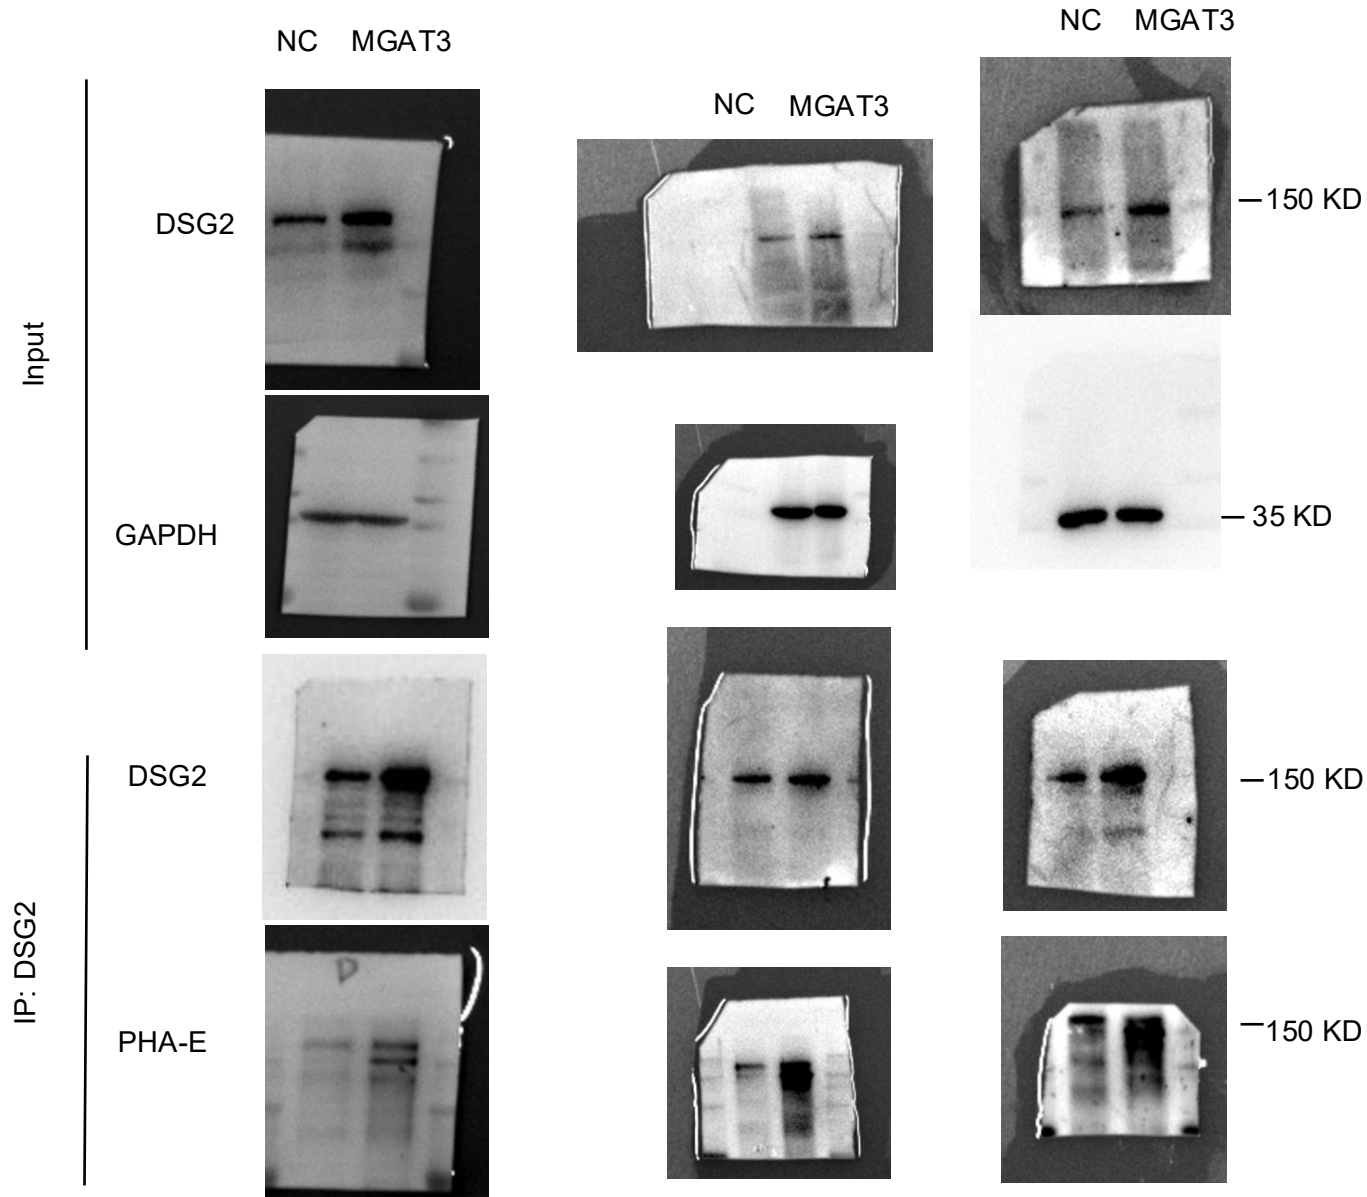

# Full unedited gel for Figure 6C

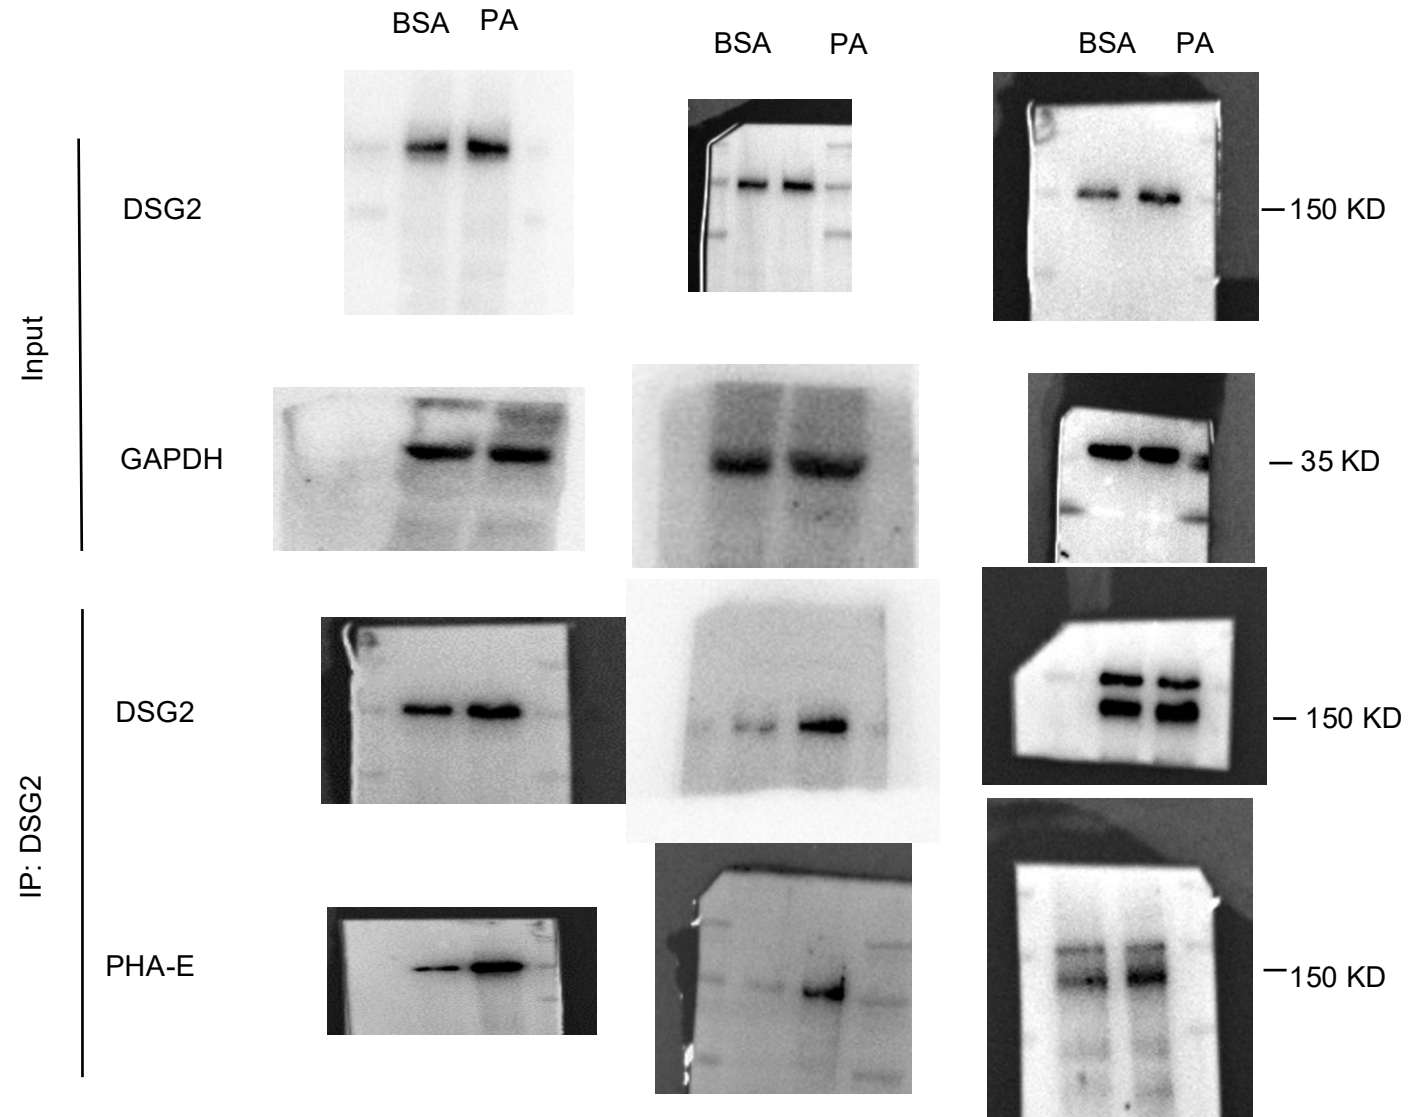

# Full unedited gel for Figure 6E

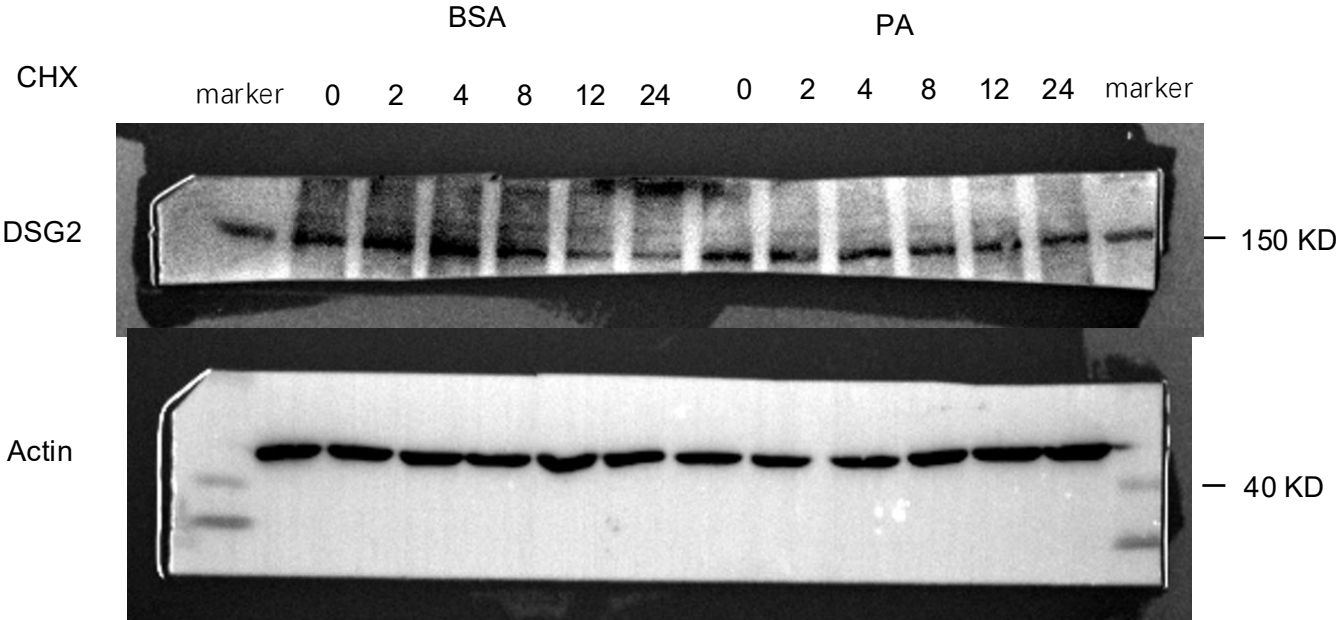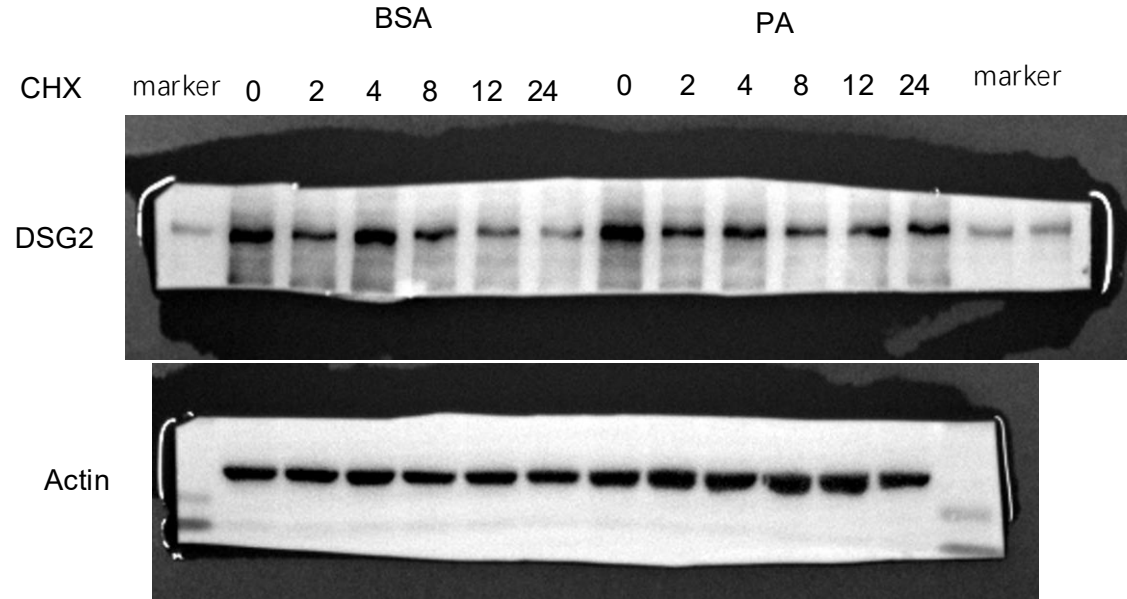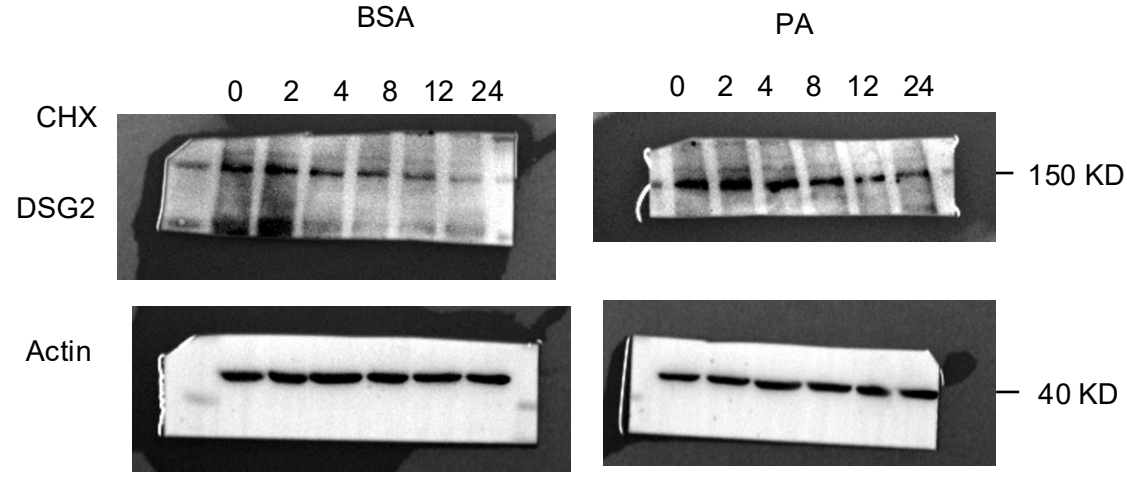

# Full unedited gel for Figure 6F

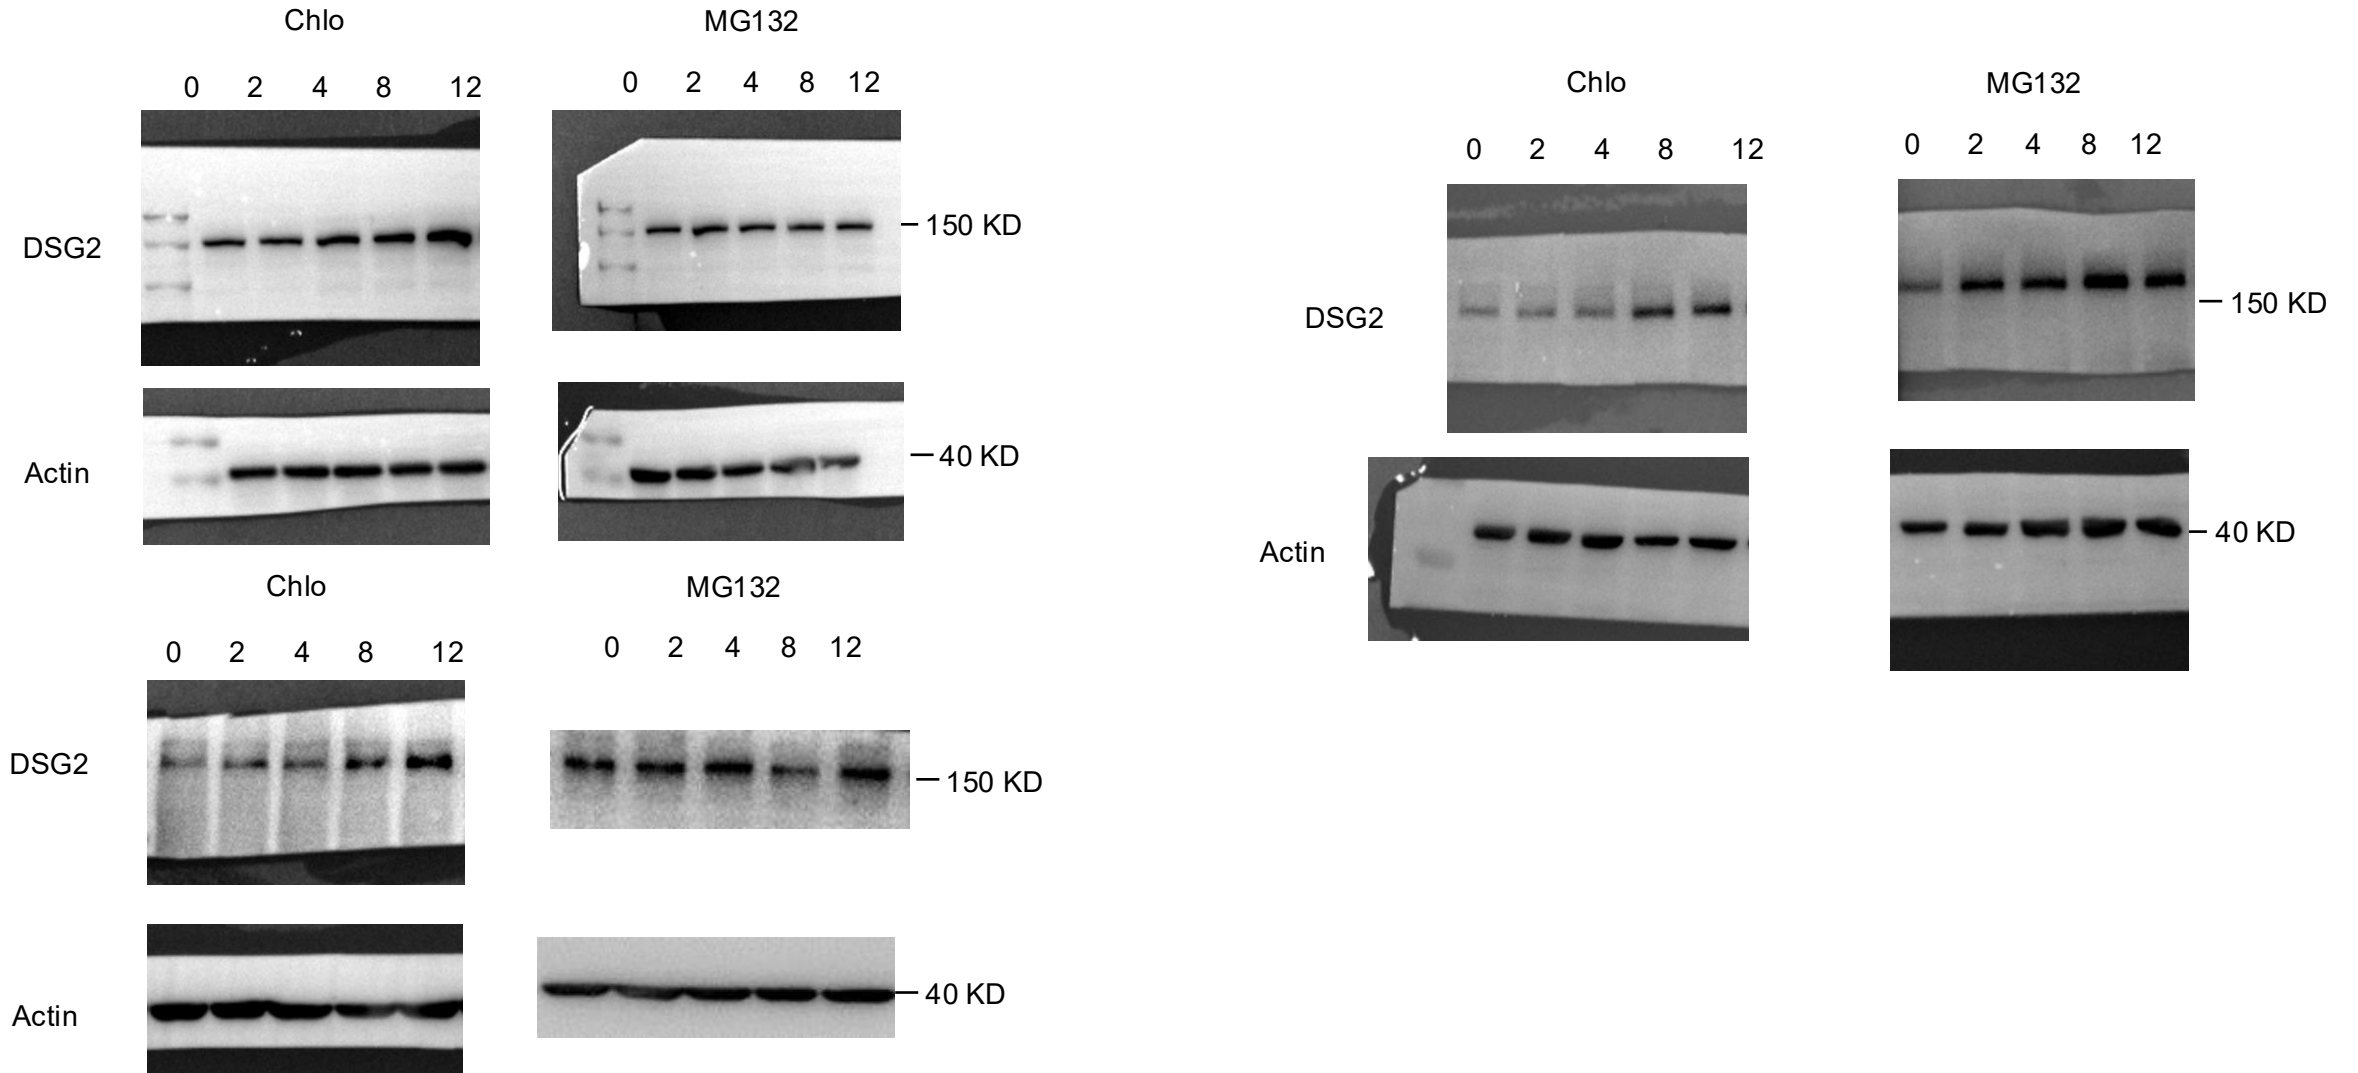

# Full unedited gel for Figure 6G

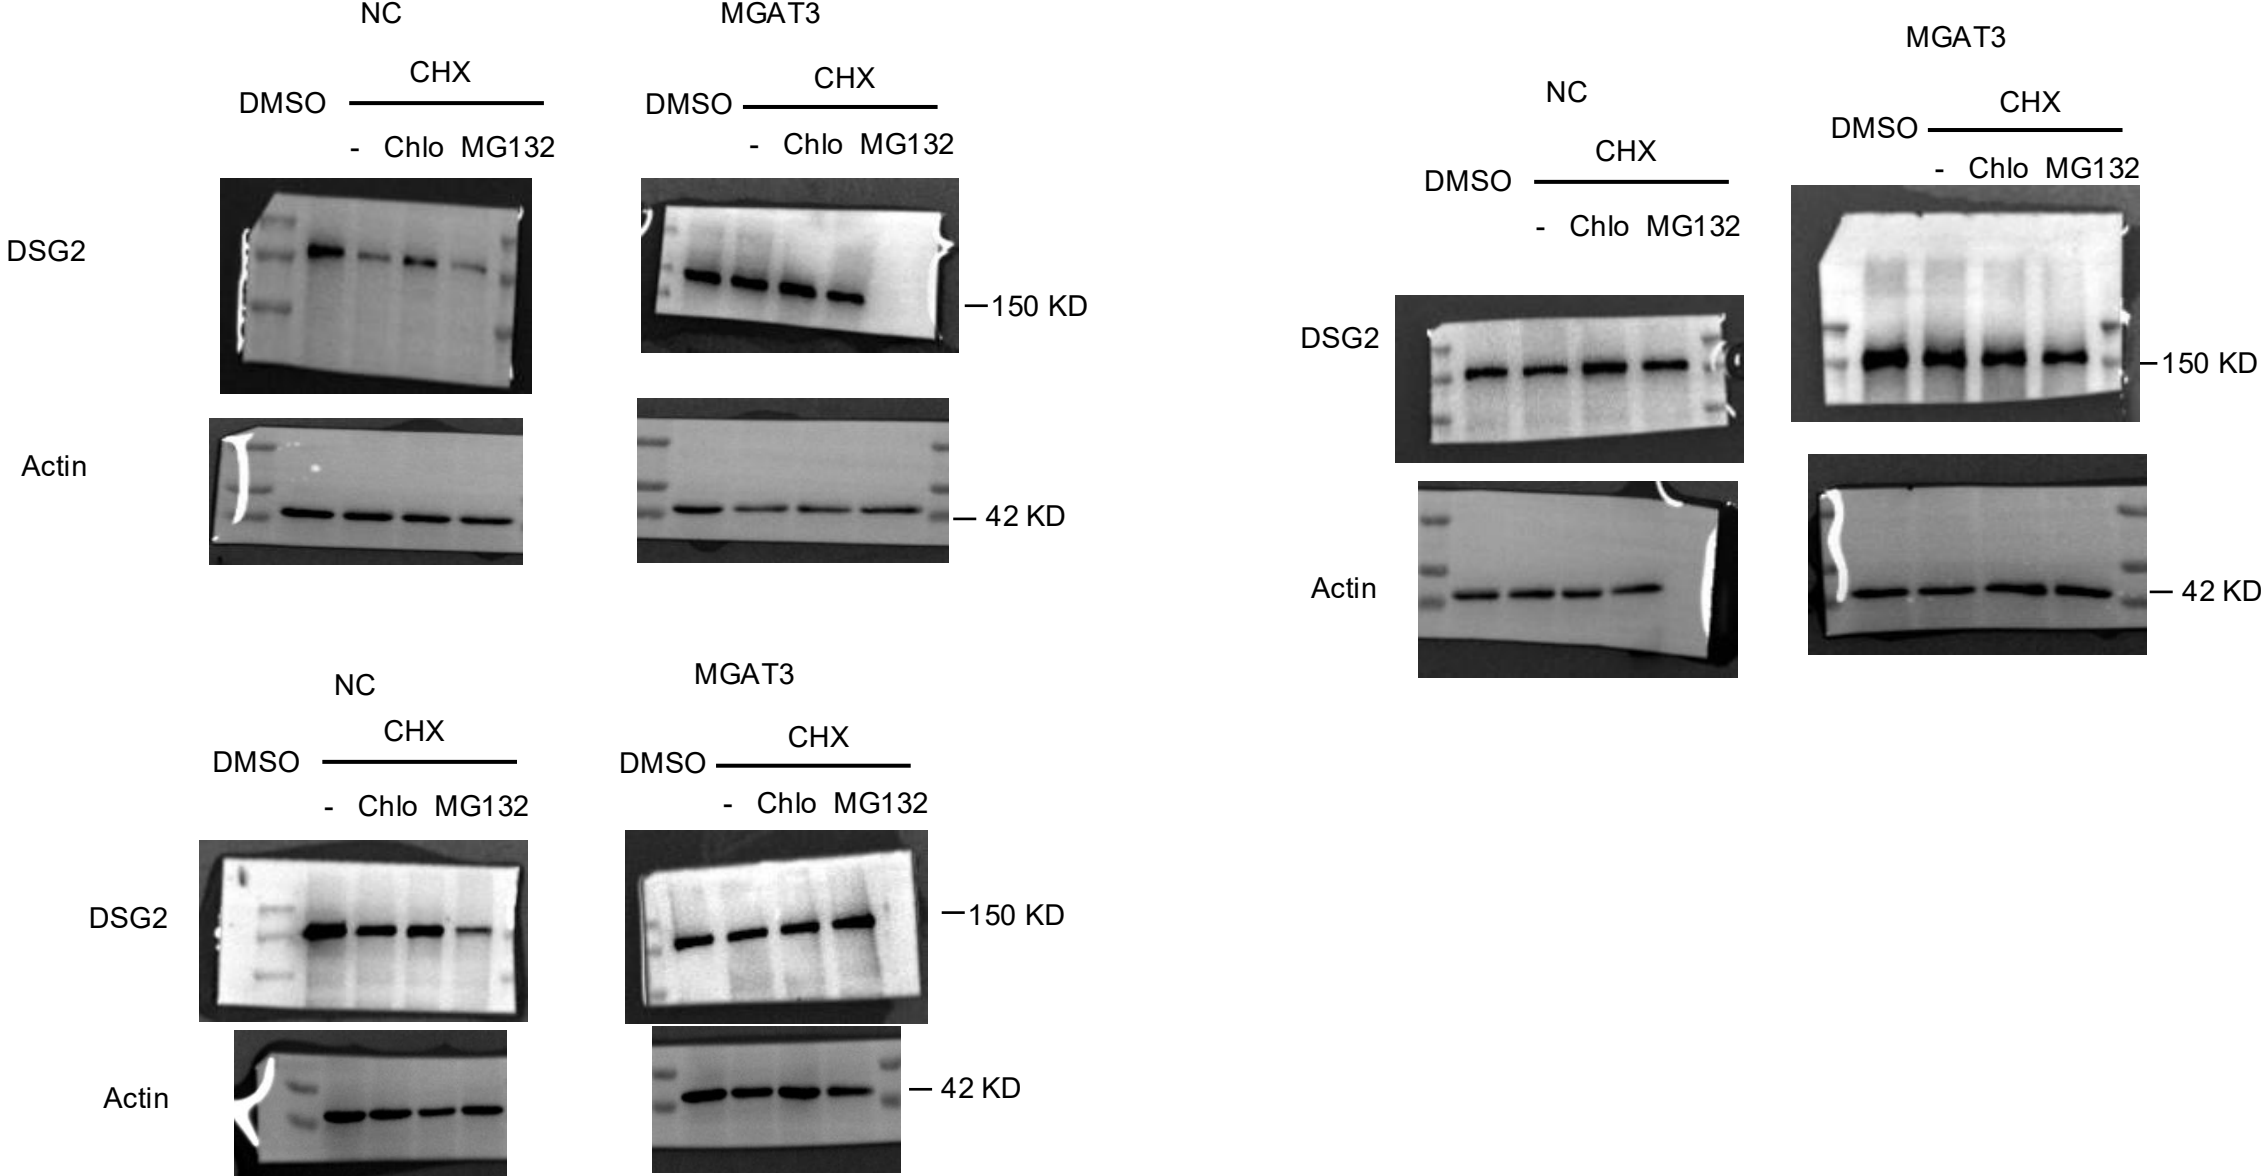

# Full unedited gel for Figure 6H

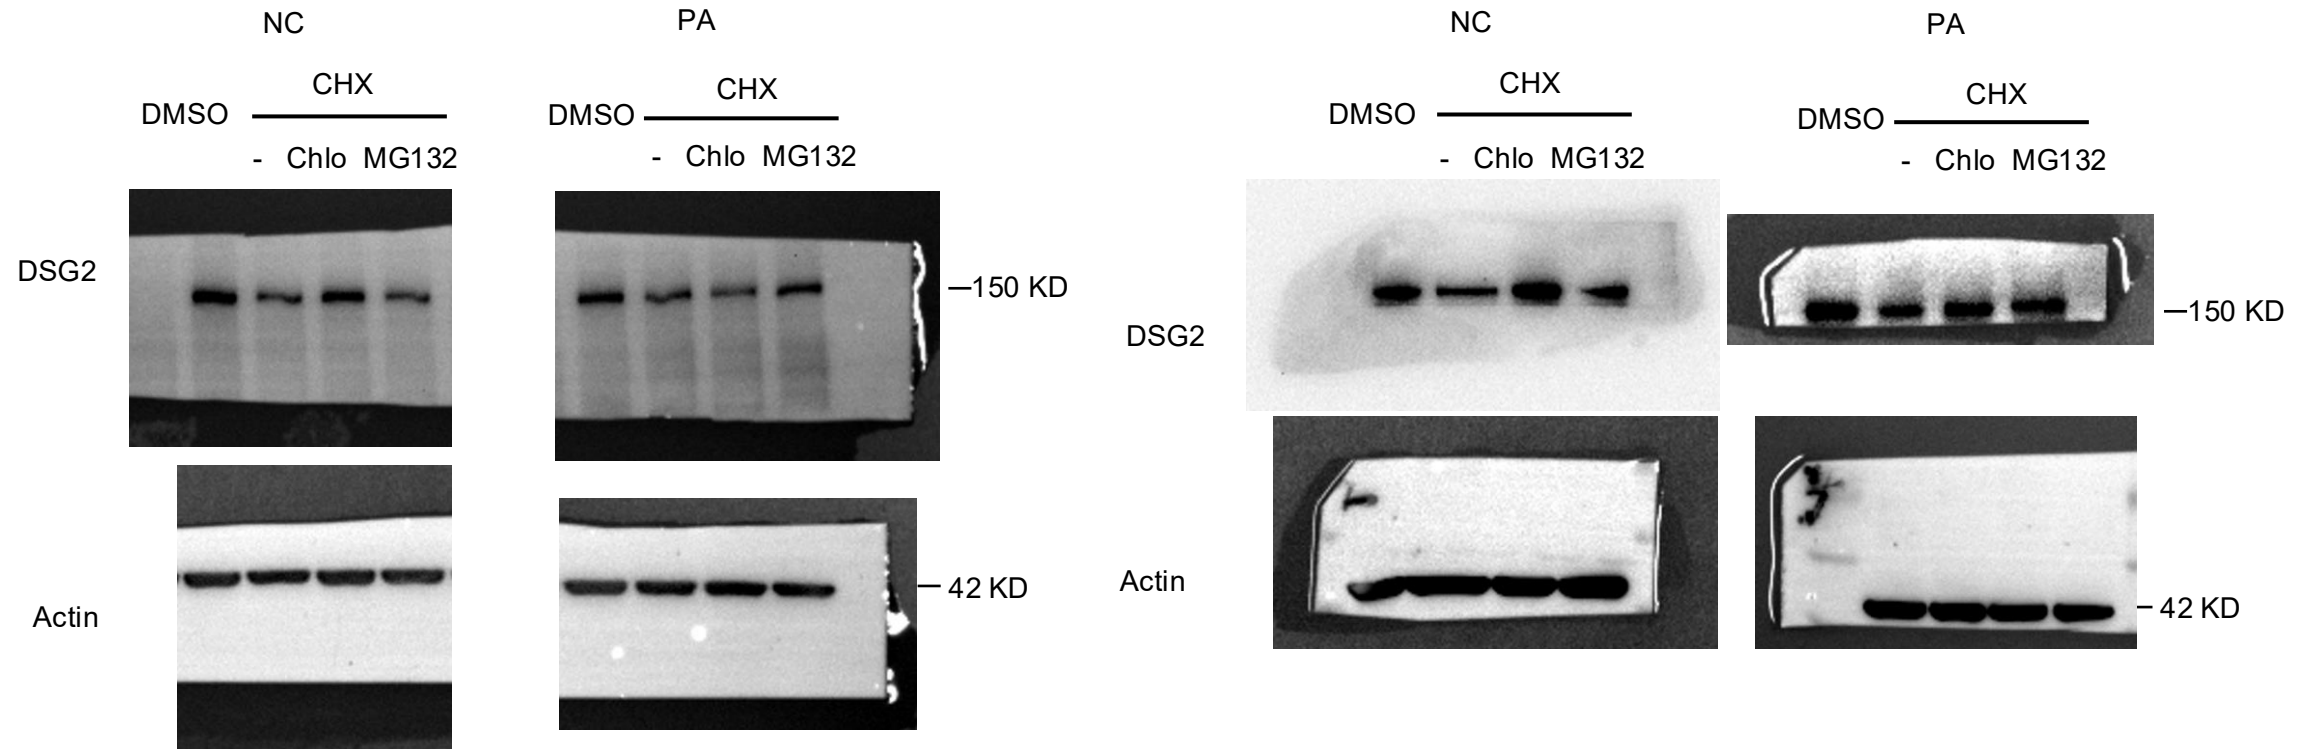

# Full unedited gel for Figure 6H

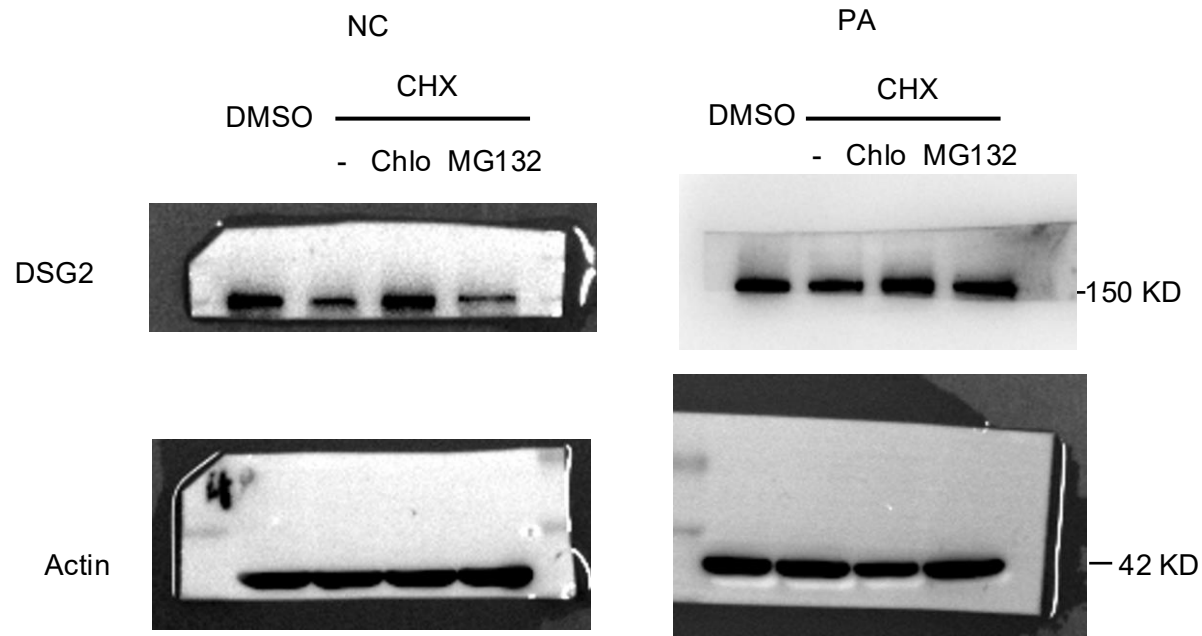

# Full unedited gel for Figure 7E

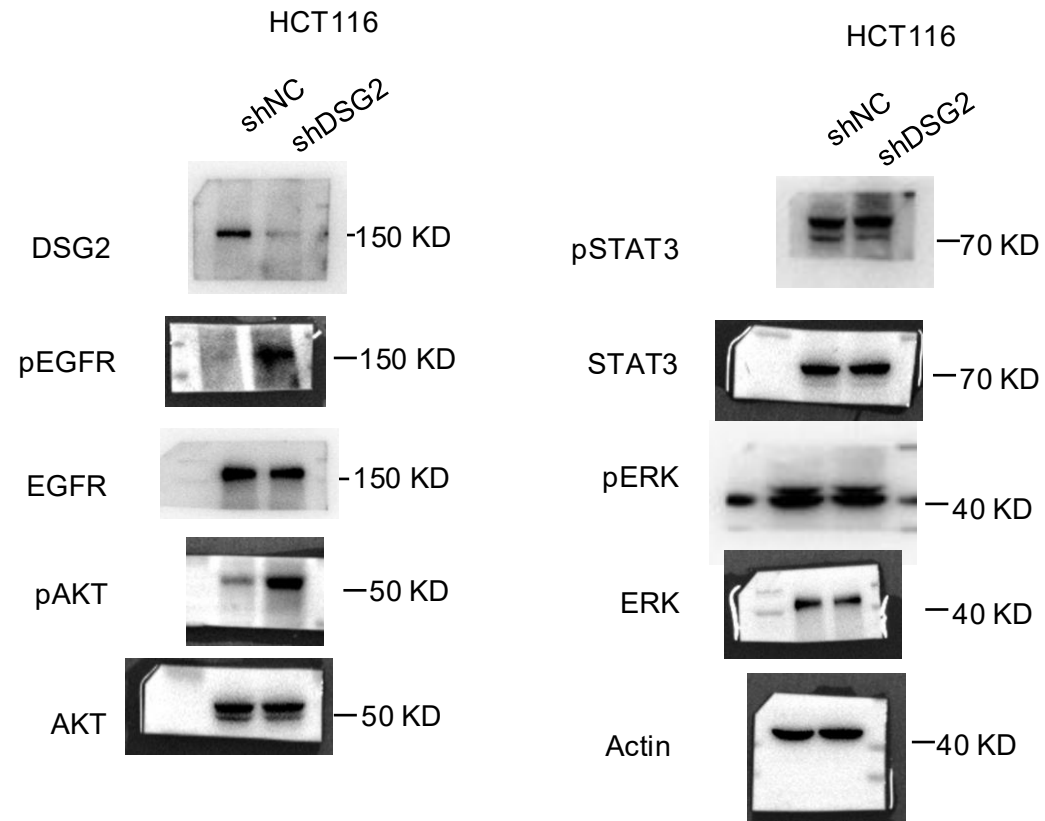

# Full unedited gel for Figure 7E

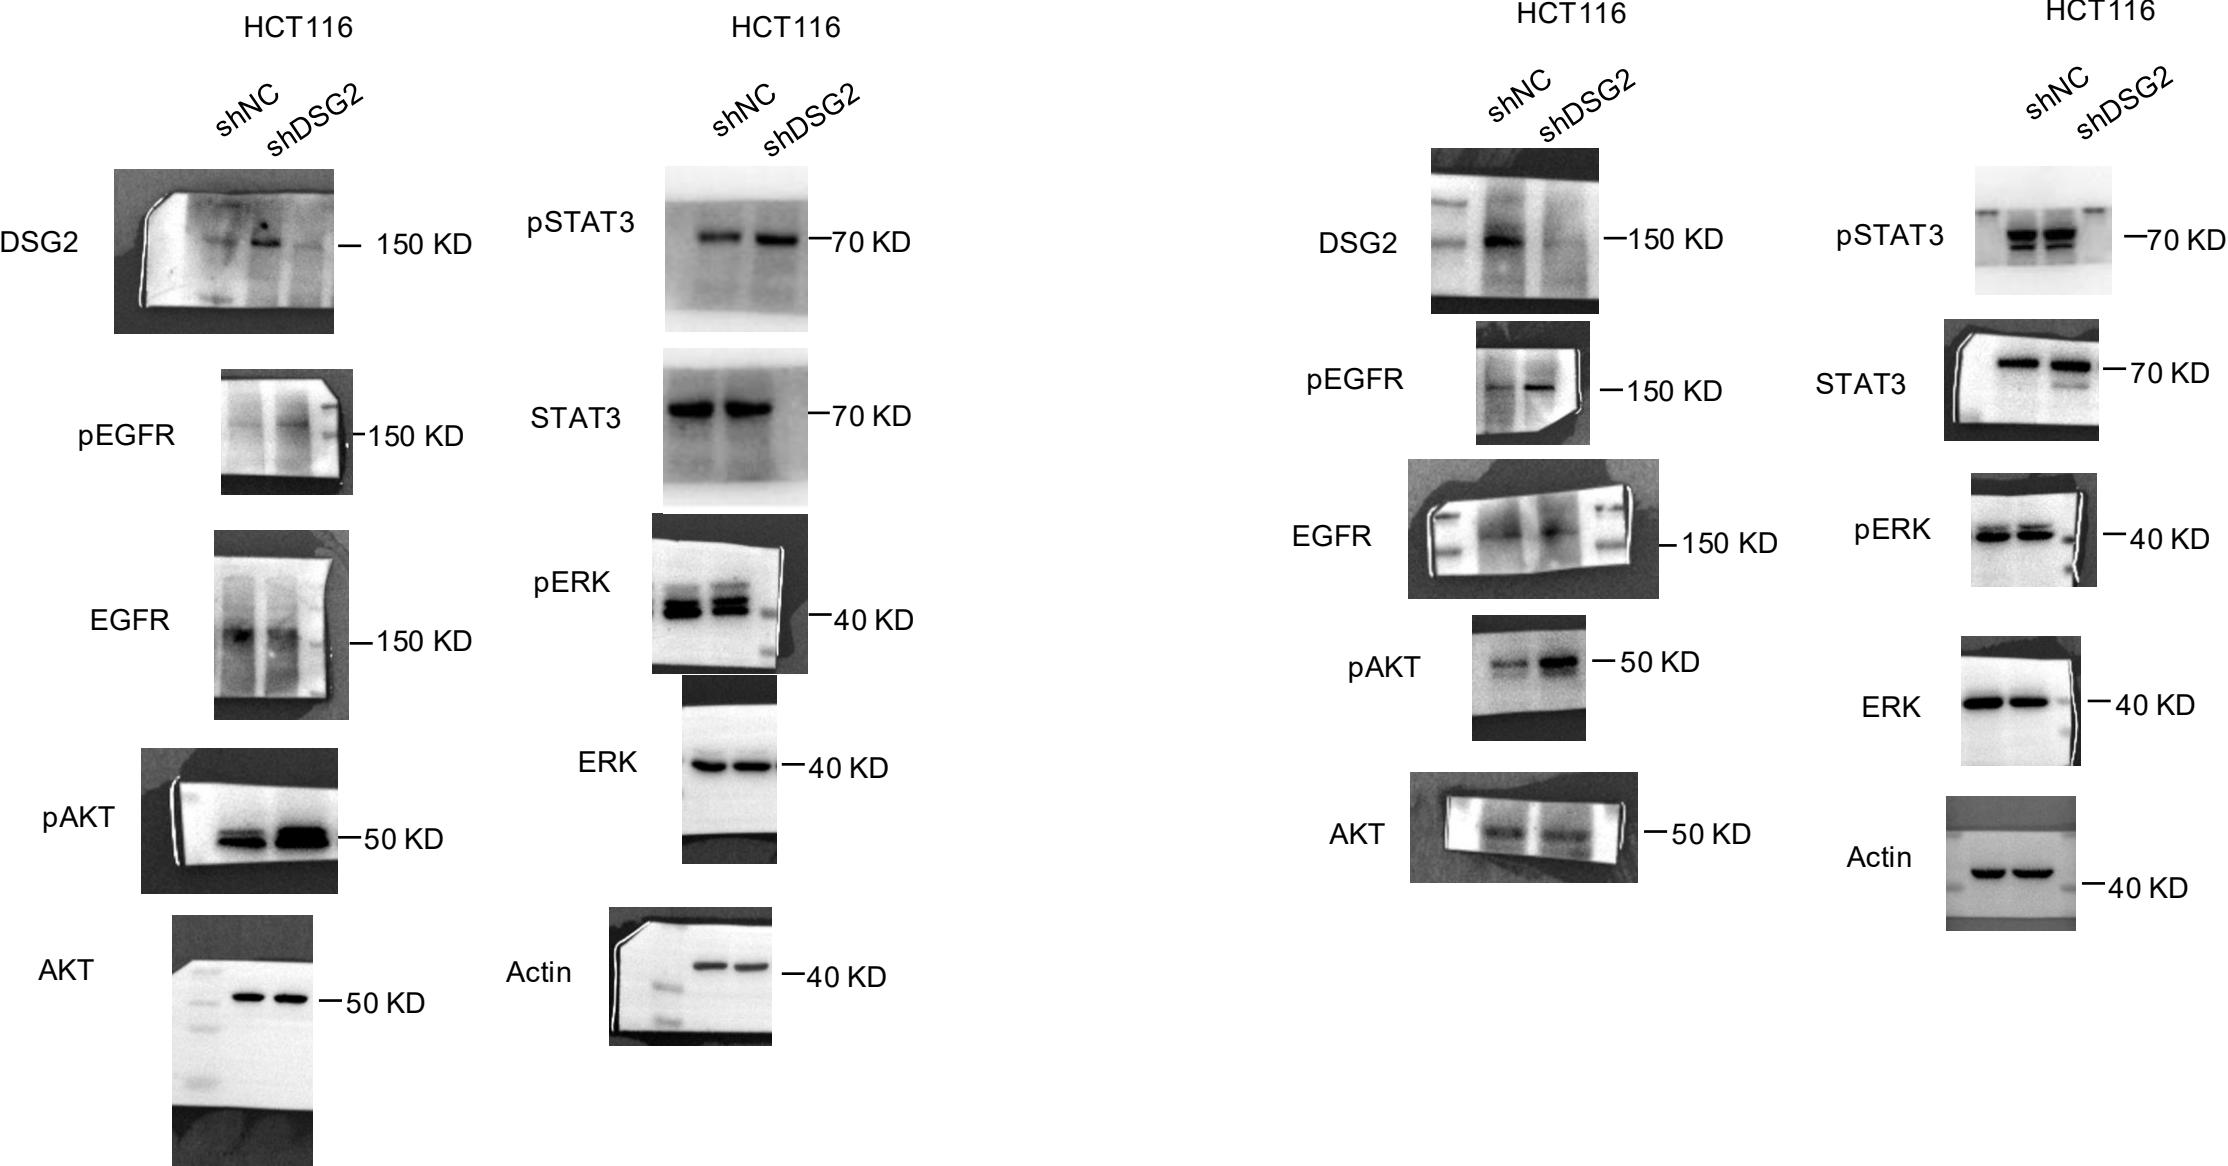

# Full unedited gel for Figure 7E

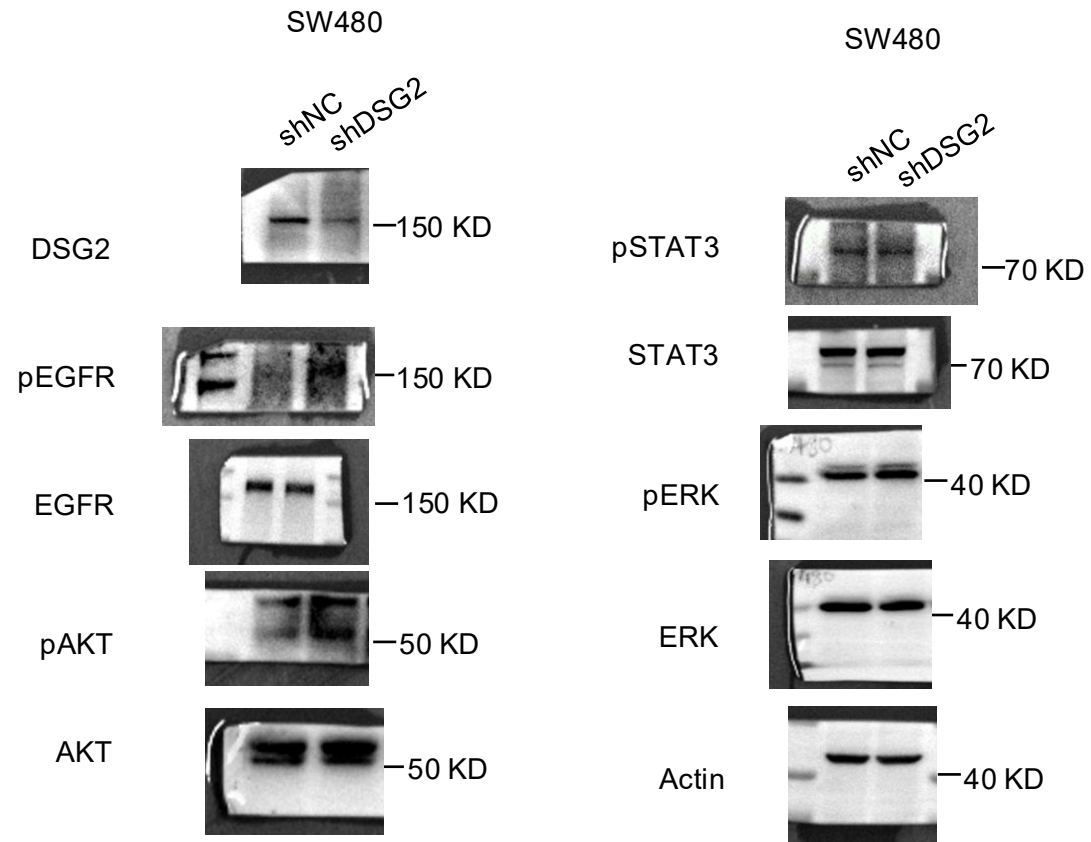

# Full unedited gel for Figure 7E

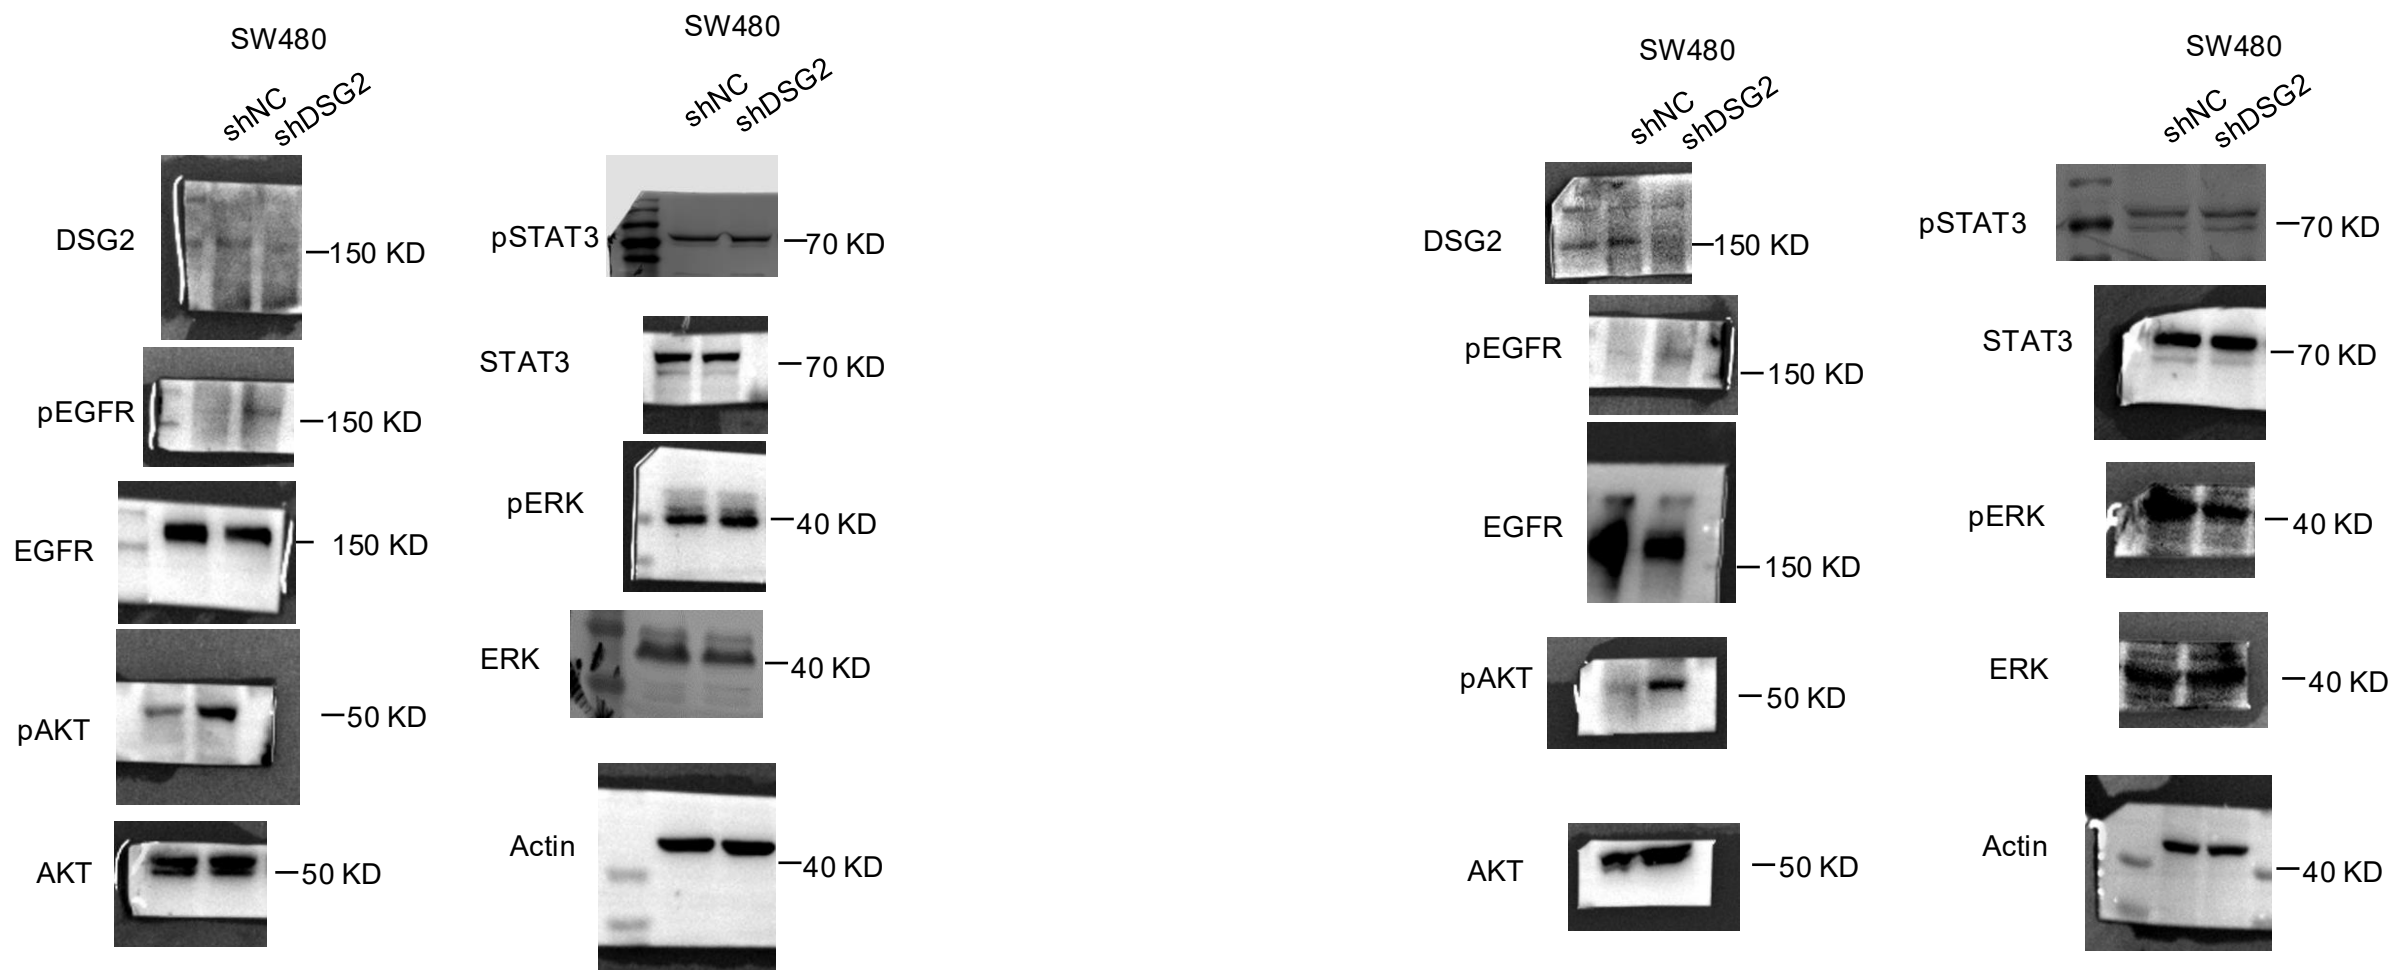

# Full unedited gel for Figure 7H

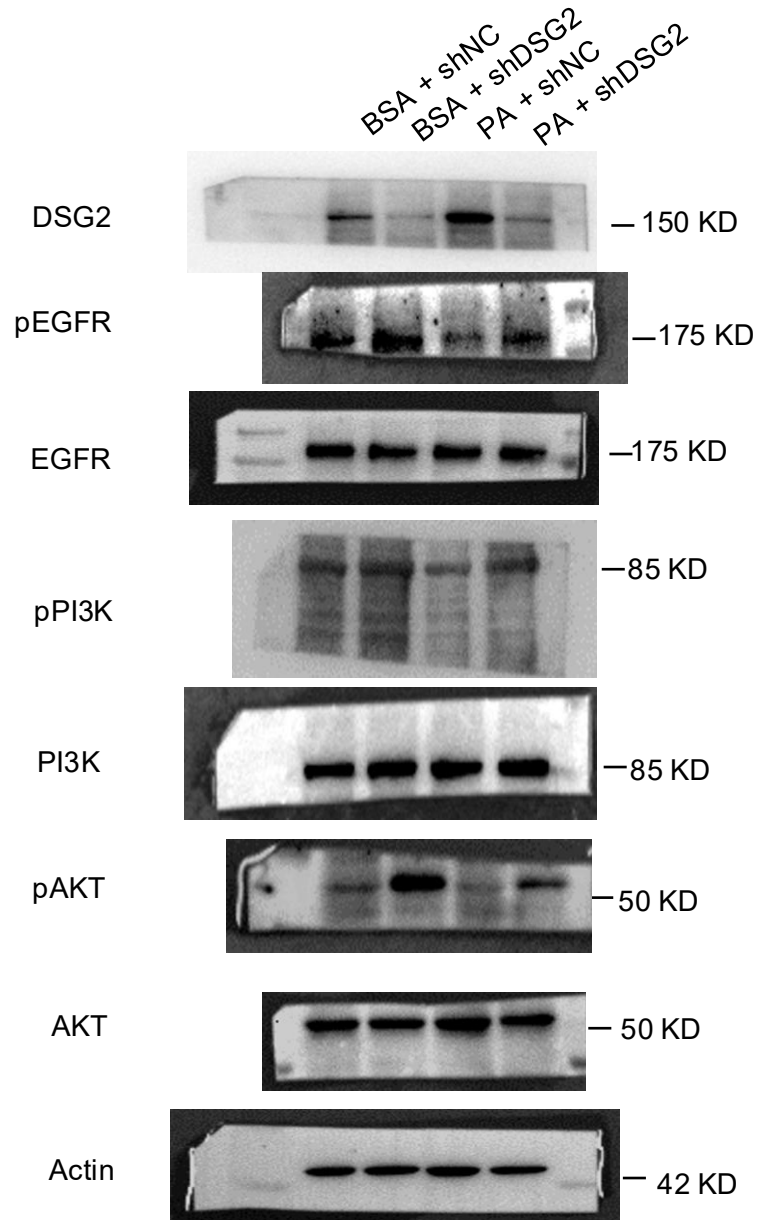

# Full unedited gel for Figure 7H

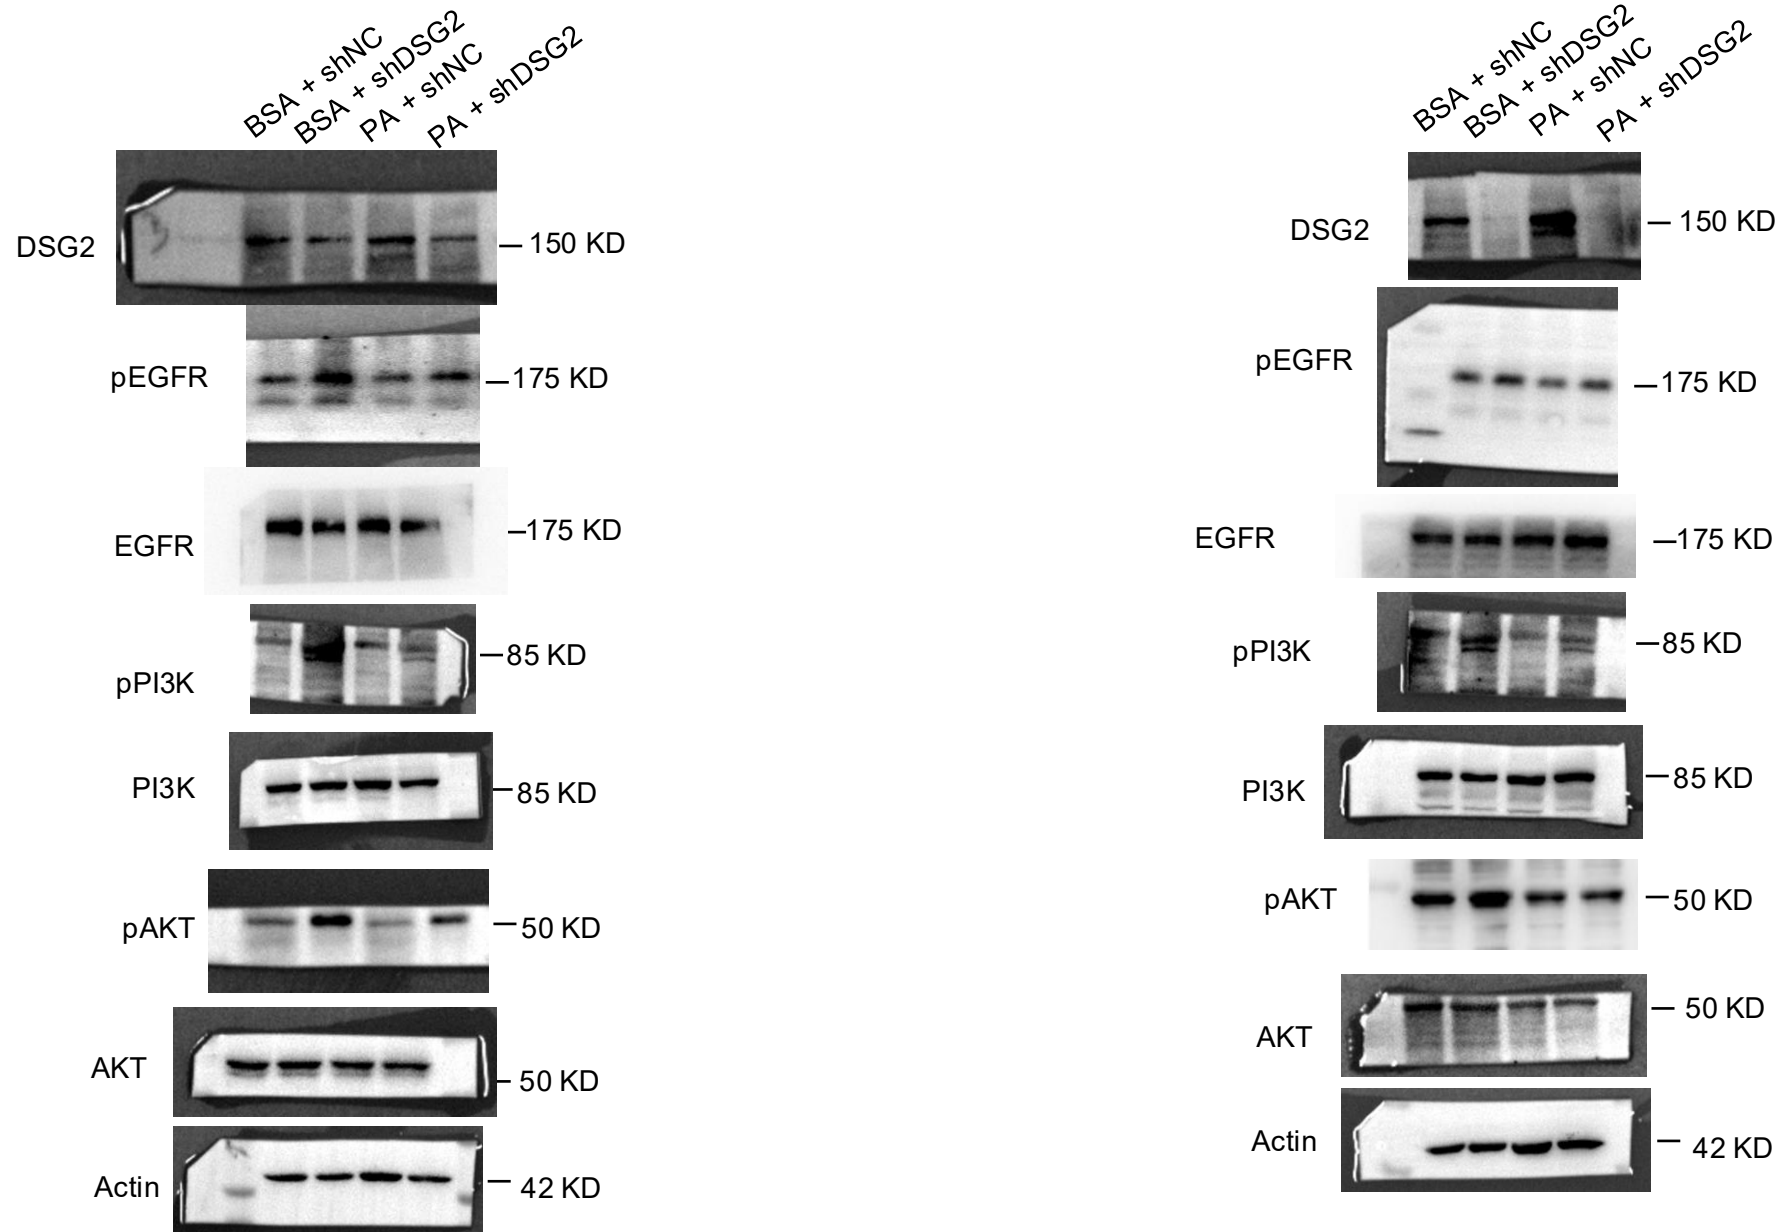

Supplement: sd2 [file 2]
